# Supplementary material for: Immediate Postoperative Coagulopathy Predicts the Long-term Survival of Traumatic Brain Injury Patients: a Retrospective Cohort Study
Source: Research Square preprint supplement (doi:10.21203/rs.3.rs-280407/v1), 2021-03-06
Supplement: Supplementary file 1 [file 02458ec29df8182015fcfe66.xlsx]

## Sheet: Sheet1
Table 4 Independent factors between immediate postoperative coagulopathy and not immediate postoperative coagulopathy
	Crude OR (95% CI )	P value	Ajusted OR (95% CI)	P value
Abnormal ALT at admission	2.093(1.368-3.204)	0.001	2.259(1.392-3.655)	0.001
Abnorml RBC at admission	3.319(1.882-5.852)	< 0.001	3.227(1.712-6.082)	< 0.001
Intraoperative infusion of Crystalloid solution > 2900 mL	2.504(1.498-4.186)	< 0.001	1.938(1.087-3.457)	0.025
Intraoperative infusion of Colloidal solution > 1100 mL	4.566(2.455-8.491)	< 0.001	3.373(1.700-6.691)	0.001
Intraoperative bleeding > 950 mL	4.840(3.084-7.596)	< 0.001	3.379(2.063-5.533)	< 0.001
