# Supplementary material for: Immediate Postoperative Coagulopathy Predicts the Long-term Survival of Traumatic Brain Injury Patients: a Retrospective Cohort Study
Source: Research Square preprint supplement (doi:10.21203/rs.3.rs-280407/v1), 2021-03-06
Supplement: Supplementary file 2 [file 1c87c0c1906f0c2da2a04c20.xlsx]

## Sheet: Sheet1
Table 1 Variables at admission between immediate postoperative coagulopathy and non-postoperative coagulopathy
	Total (n=352)	Not immediate postoperative coagulopathy (n=177)	Immediate postoperative coagulopathy (n=175)	P value
Age	50 (41,60)	50 (35.5,59.5)	51 (42,61)	0.203
Female	82 (23.30%)	46 (39.32%)	36 (20.57%)	0.229
Mechanism of injury				0.207
Motor vehicle	154 (43.75%)	85 (48.02%)	69 (39.43%)
Fall	136 (38.64%)	67 (37.85%)	69 (39.43%)
Strike	12 (3.41%)	6 (3.39%)	6 (3.43%)
Others	50 (14.20%)	19 (10.74%)	31 (17.71%)
AIS (head) = 5	149 (42.33%)	63 (35.60%)	86 (49.14%)	0.01
GCS ≤ 8	189 (53.70%)	81 (45.76%)	108 (61.71%)	0.003
Abnormal pupil reaction	273 (77.56%)	128 (72.32%)	145 (82.86%)	0.018
Midline shift	150 (42.61%)	73 (41.24%)	77 (44.00%)	0.601
Subarachnoid hemorrhage	252 (71.59%)	122 (68.93%)	130 (74.29%)	0.265
Effaced basal cisterns	138 (39.20%)	63 (35.59%)	75 (42.86%)	0.163
GLU > 151 mg/dL	126 (35.80%)	66 (37.29%)	60 (34.29%)	0.478
GB < 120 g/L	77 (21.86%)	27 (15.25%)	50 (28.57%)	0.003
AST ≥ 40U/L	238 (67.61%)	106 (59.89%)	132 (75.43%)	0.002
ALT ≥ 40U/L	185 (52.56%)	77 (43.50%)	108 (61.71%)	0.001
Abnormal RBC	72 (20.74%)	20 (11.30%)	52 (29.71%)	< 0.001
