# Supplementary material for: Immediate Postoperative Coagulopathy Predicts the Long-term Survival of Traumatic Brain Injury Patients: a Retrospective Cohort Study
Source: Research Square preprint supplement (doi:10.21203/rs.3.rs-280407/v1), 2021-03-06
Supplement: Supplementary file 3 [file 6d23b29ea58238d7bc4beaa0.xlsx]

## Sheet: Sheet1
Table 2 Perioperative variables between immediate postoperative coagulopathy and not immediate postoperative coagulopathy
	total (n=352)	Not postoperative coagulopathy (n=177)	Postoperative coagulopathy (n=175)	P value
Preoperative shock index				0.304
Normal	69 (19.60%)	35 (19.77%)	34 (19.43%)
Mild shock	229 (65.06%)	120 (67.80%)	109 (62.29%)
Moderate or severe shock	54 (15.34%)	22 (12.43%)	32 (18.29%)
Crystalloid solution				< 0.001
≤ 2900 mL	268 (76.14%)	149 (84.18%)	119 (68.00%)
> 2900 mL	84 (23.86%)	28 (15.82%)	56 (32.00%)
Colloidal solution				< 0.001
≤ 1100 mL	285 (80.97%)	162 (91.53%)	123 (70.29%)
> 1100 mL	67 (19.03%)	15 (8.47%)	52 (29.71%)
Infusion of Crystalloid +Colloidal solution				< 0.001
≤ 3450 mL	220 (62.50%)	134 (75.71%)	86 (49.14%)
> 3450 mL	132 (37.50%)	43 (24.29%)	89 (50.86%)
The ratio of infusion Plasma to RBC				0.264
< 1	44 (12.50%)	14 (7.91%)	30 (17.14%)
≥ 1	188 (53.41%)	77 (43.50%)	111 (63.43%)
Intraoperative bleeding				< 0.001
≤ 950 mL	177 (50.57%)	122 (68.93%)	55 (31.43%)
> 950 mL	175 (49.72%)	55 (31.07%)	120 (68.57%)
Net-fluid-input				< 0.001
≤ 2125 mL	205 (58.24%)	120 (67.80%)	85 (48.57%)
> 2125 mL	147 (41.76%)	57 (32.20%)	90 (51.43%)
Received Decompressive Craniectomy				< 0.001
No	121 (34.38%)	77 (43.50%)	44 (25.14%)
Yes	231 (65.63%)	100 (56.50%)	131 (74.86%)
Total surgery time				0.018
≤ 3.225 h	79 (22.44%)	49 (27.68%)	30 (17.14%)
> 3.225 h	273 (77.56%)	128 (72.32%)	145 (82.86%)
